# Supplementary material
Source: PubMed Central journal article supplement (PMC8916748)
Supplement: NIHMS1714235-supplement-Supplementary_Material.pdf [file NIHMS1714235-supplement-Supplementary_Material.pdf]

# Look at that: Spatial deixis reveals experience-related changes in prediction

## Supplementary Material

### Contents

|                                              |           |
|----------------------------------------------|-----------|
| <b>Abstract</b>                              | <b>2</b>  |
| <b>Experiment 1</b>                          | <b>3</b>  |
| Descriptive Statistics . . . . .             | 3         |
| Practice Trials . . . . .                    | 4         |
| Plurality Mixed-Effects Model . . . . .      | 5         |
| Cluster-Based Permutation Analyses . . . . . | 6         |
| Plurality Figure . . . . .                   | 7         |
| Proximity Mixed-Effects Model . . . . .      | 8         |
| Cluster-Based Permutation Analyses . . . . . | 9         |
| Proximity Figure . . . . .                   | 10        |
| L2 Adults Language Survey . . . . .          | 11        |
| Exploratory Analyses . . . . .               | 13        |
| <b>Experiment 2</b>                          | <b>15</b> |
| Descriptive Statistics . . . . .             | 15        |
| Practice Trials . . . . .                    | 16        |
| Proximity Mixed-Effects Model . . . . .      | 17        |
| Cluster-Based Permutation Analyses . . . . . | 18        |
| Proximity Figure . . . . .                   | 19        |
| L2 Adults Language Survey . . . . .          | 20        |
| Exploratory Analyses . . . . .               | 22        |

## Abstract

Prediction-based theories posit that interlocutors use prediction to process language efficiently and to coordinate dialogue. The present study evaluated whether listeners can use spatial deixis (i.e., *this*, *that*, *these*, and *those*) to predict the plurality and proximity of a speaker's upcoming referent. In two eye-tracking experiments with varying referential complexity ( $N = 168$ ), native English-speaking adults, native English-learning 5-year-olds, and non-native English-learning adults viewed images while listening to sentences with or without informative deictic determiners, e.g., *Look at the/this/that/these/those wonderful cookie(s)*. Results showed that all groups successfully exploited plurality information. However, they varied in using deixis to anticipate the proximity of the referent; specifically, L1 adults showed more robust prediction than L2 adults, and L1 children did not show evidence of prediction. By evaluating listeners with varied language experiences, this investigation helps refine proposed mechanisms of prediction, and suggests that linguistic experience is key to the development of such mechanisms.

# Experiment 1

## Descriptive Statistics

Table 1: Language Groups

| Language Group | Number of Subjects |
|----------------|--------------------|
| L1 Adults      | 28                 |
| L1 Children    | 28                 |
| L2 Adults      | 28                 |

Table 2: Age Descriptives

| Children Age in Years | Min Age | Max Age | Mean Age | SD Age |
|-----------------------|---------|---------|----------|--------|
| L1 Children           | 60      | 71      | 65.07    | 3.84   |

Table 3: Age Descriptives

| Adult Age in Years | Min Age | Max Age | Mean Age | SD Age |
|--------------------|---------|---------|----------|--------|
| L1 Adults          | 18      | 34      | 20.54    | 4.23   |
| L2 Adults          | 18      | 34      | 23.14    | 4.97   |

Table 4: Sex

| Language Group | Sex    | Number of Subjects |
|----------------|--------|--------------------|
| L1 Adults      | Female | 17                 |
| L1 Adults      | Male   | 11                 |
| L1 Children    | Female | 19                 |
| L1 Children    | Male   | 9                  |
| L2 Adults      | Female | 15                 |
| L2 Adults      | Male   | 13                 |

## Practice Trials

We first confirmed that participants understood the spatial context of the eye-tracking task by analyzing their looking behavior during practice trials. Practice trials used deixis contrastively and emphasized the proximity information encoded in deictic terms by pairing the proximal and distal deictic terms with “over here” and “over there” respectively. We analyzed participants’ proportion of target looks during a time window from 200 ms after the exact onset of the deictic determiner to 2000 ms after the exact onset of the target noun using one-tailed one-sample t-tests to compare target looks to chance performance (50%). We found that all groups reliably looked to the target referent during practice trials:

Table 5: One-Sample T-test Summary

| One-Sample T-tests     | df | t     | p      | Cohen’s d |
|------------------------|----|-------|--------|-----------|
| L1 Adults vs. Chance   | 27 | 11.35 | < .001 | 2.14      |
| L1 Children vs. Chance | 27 | 3.75  | < .001 | 0.71      |
| L2 Adults vs. Chance   | 27 | 9.27  | < .001 | 1.75      |

## Plurality Mixed-Effects Model

We analyzed listeners' proportion of looks to plural referents for singular deictic sentences (e.g., *this/that cookie*) and plural deictic sentences (e.g., *these/those cookies*) with a mixed-effects logistic regression model, including fixed effects for language group (contrasts: L1 adults, L1 children, L2 adults), condition (contrasts: singular, plural) and time (100-ms bins, -1000 to 500 ms from noun onset) and their interactions. The model also included random intercepts for subjects and items. The below table summarizes results.

| term                           | estimate | statistic | p.value | sig |
|--------------------------------|----------|-----------|---------|-----|
| Intercept                      | 0.005    | 0.04      | 0.97    |     |
| L1 Children                    | 0.524    | 3.90      | < 0.001 | *   |
| L2 Adults                      | 0.541    | 4.01      | < 0.001 | *   |
| Condition                      | -1.591   | -14.10    | < 0.001 | *   |
| Time                           | 0.048    | 1.04      | 0.3     |     |
| L1 Children x Condition        | 0.885    | 13.78     | < 0.001 | *   |
| L2 Adults x Condition          | 0.334    | 5.19      | < 0.001 | *   |
| L1 Children x Time             | -0.140   | -2.18     | 0.029   | *   |
| L2 Adults x Time               | -0.173   | -2.68     | 0.007   | *   |
| Condition x Time               | -0.964   | -21.04    | < 0.001 | *   |
| L1 Children x Condition x Time | 0.477    | 7.46      | < 0.001 | *   |
| L2 Adults x Condition x Time   | 0.291    | 4.54      | < 0.001 | *   |

## Cluster-Based Permutation Analyses

We first evaluated whether participants used deixis to predict the *plurality* of the referent. We compared looks to plural referents for singular deictic sentences (e.g., *this/that cookie*) and plural deictic sentences (e.g., *these/those cookies*) with a cluster-based permutation analysis (Maris & Oostenveld, 2007). The below tables summarize results for L1 adults, L1 children, and L2 adults, respectively.

| start | end | cluster.stat | pval    |
|-------|-----|--------------|---------|
| -500  | 500 | 91.8227      | < 0.001 |

| start | end | cluster.stat | pval    |
|-------|-----|--------------|---------|
| -400  | 500 | 46.36682     | < 0.001 |

| start | end | cluster.stat | pval    |
|-------|-----|--------------|---------|
| -800  | 500 | 77.20261     | < 0.001 |

We also used cluster-based permutation analysis to compare looks to plural referents for singular and plural neutral sentences (e.g., *the cookie* vs. *the cookies*). In this case, because the neutral determiner “the” does not provide information about the plurality of the subsequent noun, we expect to observe significant effects *after* the onset of the noun, indicating that participants oriented to the appropriate plural and singular referents once they had access to the noun’s number marking. The below tables summarize results for L1 adults, L1 children, and L2 adults, respectively.

| start | end  | cluster.stat | pval    |
|-------|------|--------------|---------|
| 200   | 1000 | 200.2182     | < 0.001 |

| start | end  | cluster.stat | pval    |
|-------|------|--------------|---------|
| 400   | 1000 | 64.50257     | < 0.001 |

| start | end  | cluster.stat | pval    |
|-------|------|--------------|---------|
| 200   | 1000 | 136.3902     | < 0.001 |

## Plurality Figure

Experiment 1 results. Proportion of looks to plural referents for L1 adults ( $n = 28$ ), L1 children ( $n = 28$ ), and L2 adults ( $n = 28$ ) during plural deictic sentences (blue) and singular deictic sentences (purple). Line shading represents one standard error from the mean, averaged by subjects. Vertical dashed lines indicate noun onset (e.g., cookie/cookies). Area shading indicates significant effects from cluster-based permutation analyses ( $ps < 0.05$ ). In sum, results indicate that L1 adults, L1 children, and L2 adults used the plurality of deictic determiners to predict the plurality of the upcoming referent, as evident from anticipatory eye movements generated before the onset of the number-marked noun.

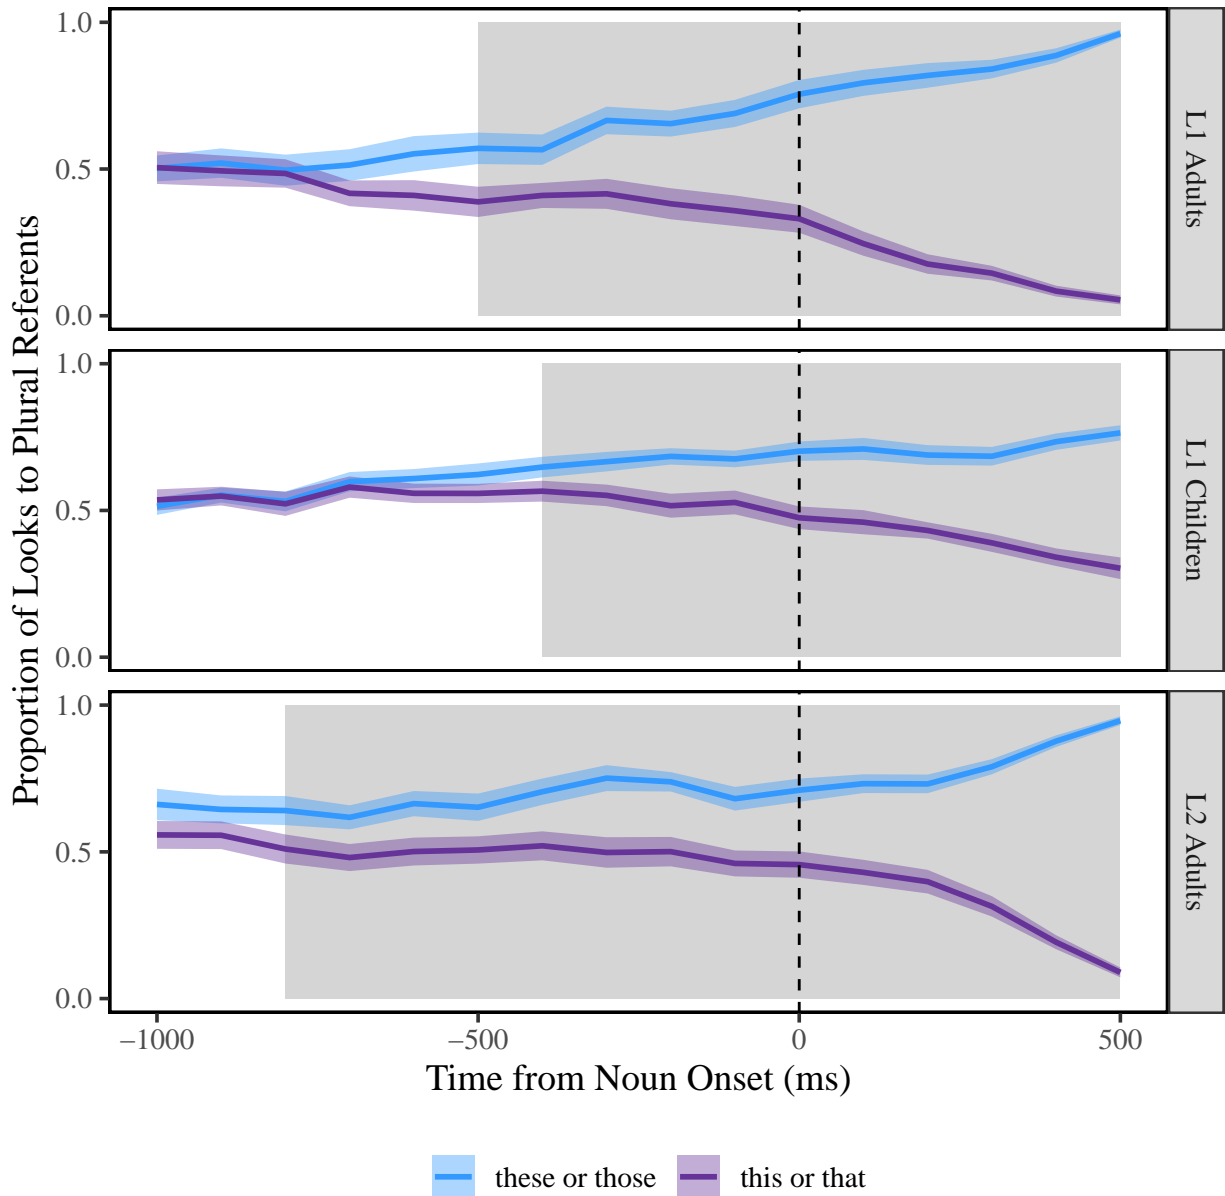

## Proximity Mixed-Effects Model

We next evaluated whether participants used deixis to predict the proximity of the referent, using a mixed-effects logistic regression model and cluster-based permutation analyses, repeating the above plurality analyses. We compared looks to proximal referents for proximal deictic sentences (e.g., *this/these cookie/cookies*) and distal deictic sentences (e.g., *that/those cookie/cookies*). The below table summarizes results.

| term                           | estimate | statistic | p.value | sig |
|--------------------------------|----------|-----------|---------|-----|
| Intercept                      | 0.724    | 3.60      | 0.001   | *   |
| L1 Children                    | 0.312    | 1.18      | 0.242   |     |
| L2 Adults                      | 0.322    | 1.21      | 0.229   |     |
| Condition                      | -0.957   | -21.08    | < 0.001 | *   |
| Time                           | -0.353   | -7.73     | < 0.001 | *   |
| L1 Children x Condition        | 0.770    | 12.22     | < 0.001 | *   |
| L2 Adults x Condition          | 0.401    | 6.35      | < 0.001 | *   |
| L1 Children x Time             | 0.297    | 4.69      | < 0.001 | *   |
| L2 Adults x Time               | -0.105   | -1.65     | 0.1     |     |
| Condition x Time               | -0.822   | -18.27    | < 0.001 | *   |
| L1 Children x Condition x Time | 0.529    | 8.42      | < 0.001 | *   |
| L2 Adults x Condition x Time   | 0.138    | 2.19      | 0.029   | *   |



## Cluster-Based Permutation Analyses

The below tables summarize results for L1 adults, L1 children, and L2 adults, respectively.

| start | end | cluster.stat | pval    |
|-------|-----|--------------|---------|
| -100  | 500 | 50.67892     | < 0.001 |

| start | end | cluster.stat | pval    |
|-------|-----|--------------|---------|
| 300   | 500 | 14.44599     | < 0.001 |

| start | end | cluster.stat | pval    |
|-------|-----|--------------|---------|
| 200   | 500 | 32.09432     | < 0.001 |

We also used cluster-based permutation analysis to compare looks to proximal referents for proximal and distal neutral sentences (e.g., *the cookie/cookies* with a proximal referent vs. *the cookie/cookies* with a distal referent). As with the previous analysis of neutral sentences, we expect to observe significant effects *after* the onset of the noun, indicating that participants oriented to the appropriate proximal and distal referents once they had access to the noun. The below tables summarize results for L1 adults, L1 children, and L2 adults, respectively.

| start | end  | cluster.stat | pval    |
|-------|------|--------------|---------|
| 300   | 1000 | 159.8579     | < 0.001 |

| start | end  | cluster.stat | pval    |
|-------|------|--------------|---------|
| 200   | 1000 | 58.26556     | < 0.001 |

| start | end  | cluster.stat | pval    |
|-------|------|--------------|---------|
| 200   | 1000 | 138.4025     | < 0.001 |

## Proximity Figure

Experiment 1 results. Proportion of looks to proximal referents for L1 adults ( $n = 28$ ), L1 children ( $n = 28$ ), and L2 adults ( $n = 28$ ) during proximal deictic sentences (blue) and distal deictic sentences (purple). Line shading represents one standard error from the mean, averaged by subjects. Vertical dashed lines indicate noun onset (e.g., cookie/cookies). Area shading indicates significant effects from cluster-based permutation analyses ( $ps < 0.05$ ). In sum, results indicate that only L1 adults used the proximity information encoded in deictic determiners to predict the proximity of the upcoming referent.

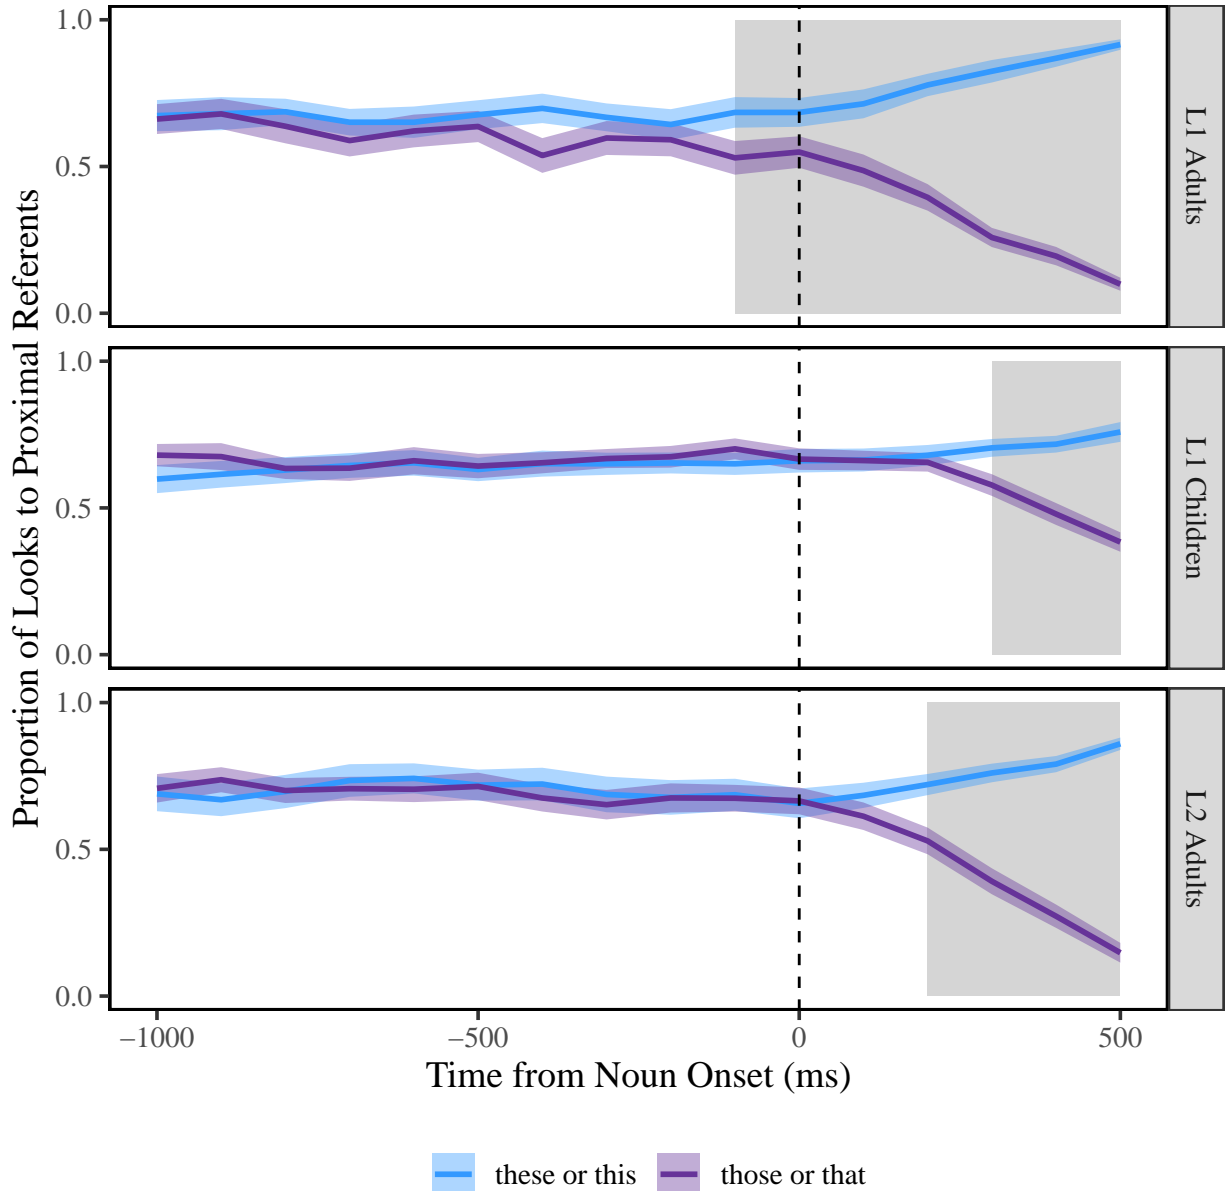

## L2 Adults Language Survey

| Age Started Learning English | Number of Subjects |
|------------------------------|--------------------|
| 1                            | 1                  |
| 2                            | 1                  |
| 3                            | 4                  |
| 4                            | 4                  |
| 5                            | 2                  |
| 6                            | 2                  |
| 7                            | 5                  |
| 8                            | 2                  |
| 9                            | 1                  |
| 10                           | 2                  |
| 11                           | 1                  |
| 12                           | 3                  |

| Measure                              | Min | Max | Mean | SD   |
|--------------------------------------|-----|-----|------|------|
| Proficiency in Speaking English      | 4   | 9   | 7.57 | 1.50 |
| Proficiency in Understanding English | 5   | 9   | 7.96 | 1.20 |
| Proficiency in Reading English       | 6   | 9   | 8.21 | 0.96 |
| Proficiency in Writing English       | 4   | 9   | 7.71 | 1.46 |
| Accent when Speaking English         | 1   | 9   | 6.39 | 2.38 |
| Comfort when Speaking English        | 3   | 9   | 7.25 | 1.80 |

| Measure                                       | Min | Max | Mean | SD   |
|-----------------------------------------------|-----|-----|------|------|
| Years of ESL Classes during Elementary School | 0   | 5   | 2.32 | 2.04 |
| ... during Middle School                      | 0   | 5   | 1.82 | 1.56 |
| ... during High School                        | 0   | 5   | 1.75 | 1.76 |
| ... during College / after High School        | 0   | 5   | 0.61 | 1.26 |

| Do you watch television/movies and/or listen to music in English? | Number of Subjects |
|-------------------------------------------------------------------|--------------------|
| Often                                                             | 17                 |
| Sometimes                                                         | 11                 |

| Native Language(s) | Number of Subjects |
|--------------------|--------------------|
| Bulgarian          | 2                  |
| Cantonese          | 6                  |
| German             | 1                  |
| Hebrew             | 1                  |
| Indonesian         | 1                  |
| Italian            | 1                  |
| Japanese           | 1                  |
| Kinyarwanda        | 1                  |
| Korean             | 4                  |
| Mandarin           | 1                  |
| Modern Greek       | 1                  |
| Nepalese           | 1                  |
| Portuguese         | 1                  |
| Russian            | 2                  |
| Spanish            | 2                  |
| Telugu             | 1                  |
| Vietnamese         | 1                  |

| Language(s) Spoken at Home before College | Number of Subjects |
|-------------------------------------------|--------------------|
| Bulgarian                                 | 2                  |
| Cantonese                                 | 6                  |
| German                                    | 1                  |
| Hebrew                                    | 1                  |
| Indonesian and English                    | 1                  |
| Italian                                   | 1                  |
| Japanese                                  | 1                  |
| Kinyarwanda and French and Swahili        | 1                  |
| Korean                                    | 3                  |
| Korean and English                        | 1                  |
| Mandarin                                  | 1                  |
| Modern Greek                              | 1                  |
| Nepalese                                  | 1                  |
| Portuguese                                | 1                  |
| Russian                                   | 2                  |
| Spanish                                   | 1                  |
| Spanish and Italian                       | 1                  |
| Telugu and Hindi                          | 1                  |
| Vietnamese                                | 1                  |

## Exploratory Analyses

We conducted exploratory analyses to correlate L2 adults' looking behaviors during eye tracking with the questionnaire measures. The below table summarizes results.

Table 26: Correlation Summary

| Prediction Correlated with...                      | R      | df | p-value |
|----------------------------------------------------|--------|----|---------|
| Age Began Learning English                         | 0.234  | 26 | 0.231   |
| Total Years of English Exposure                    | -0.223 | 26 | 0.255   |
| Total Years of ESL Classes                         | 0.143  | 26 | 0.469   |
| Self-Reported Proficiency in Understanding English | 0.003  | 26 | 0.989   |
| Self-Reported English Proficiency Composite Score  | 0.056  | 26 | 0.778   |

Are any groups suspiciously “accidentally correct” - already looking to the target above chance at determiner onset?

```
##
## One Sample t-test
##
## data: L1s$targetlook.mean
## t = 0.19382, df = 295, p-value = 0.8465
## alternative hypothesis: true mean is not equal to 0.25
## 95 percent confidence interval:
## 0.2066534 0.3028171
## sample estimates:
## mean of x
## 0.2547352

##
## One Sample t-test
##
## data: L1kids$targetlook.mean
## t = 0.11159, df = 342, p-value = 0.9112
## alternative hypothesis: true mean is not equal to 0.25
## 95 percent confidence interval:
## 0.2080149 0.2970354
## sample estimates:
## mean of x
## 0.2525251

##
## One Sample t-test
##
## data: L2s$targetlook.mean
## t = 1.191, df = 296, p-value = 0.2346
## alternative hypothesis: true mean is not equal to 0.25
## 95 percent confidence interval:
## 0.2305893 0.3289125
## sample estimates:
## mean of x
## 0.2797509
```

# Experiment 2

## Descriptive Statistics

Table 27: Language Groups

| Language Group | Number of Subjects |
|----------------|--------------------|
| L1 Adults      | 28                 |
| L1 Children    | 28                 |
| L2 Adults      | 28                 |

Table 28: Age Descriptives

| Children Age in Years | Min Age | Max Age | Mean Age | SD Age |
|-----------------------|---------|---------|----------|--------|
| L1 Children           | 60      | 69      | 63.21    | 2.57   |

Table 29: Age Descriptives

| Adult Age in Years | Min Age | Max Age | Mean Age | SD Age |
|--------------------|---------|---------|----------|--------|
| L1 Adults          | 18      | 21      | 19.32    | 1.22   |
| L2 Adults          | 18      | 35      | 22.07    | 4.22   |

Table 30: Sex

| Language Group | Sex    | Number of Subjects |
|----------------|--------|--------------------|
| L1 Adults      | Female | 19                 |
| L1 Adults      | Male   | 9                  |
| L1 Children    | Female | 16                 |
| L1 Children    | Male   | 12                 |
| L2 Adults      | Female | 15                 |
| L2 Adults      | Male   | 13                 |

## Practice Trials

As in Experiment 1, we first analyzed participants' looking behavior during practice trials to confirm they understood the spatial context of the task. As in Experiment 1, and again found that all groups reliably looked to the target referent during practice trials.

Table 31: One-Sample T-test Summary

| One-Sample T-tests     | df | t     | p      | Cohen's d |
|------------------------|----|-------|--------|-----------|
| L1 Adults vs. Chance   | 27 | 12.25 | < .001 | 2.32      |
| L1 Children vs. Chance | 27 | 2.65  | 0.007  | 0.50      |
| L2 Adults vs. Chance   | 27 | 5.21  | < .001 | 0.98      |



## Proximity Mixed-Effects Model

As in Experiment 1, we analyzed listeners' proportion of looks to proximal referents with a mixed-effects model, using the same specifications as the previous models. The below table summarizes results.

| term                           | estimate | statistic | p.value | sig |
|--------------------------------|----------|-----------|---------|-----|
| Intercept                      | 1.136    | 7.29      | < 0.001 | *   |
| L1 Children                    | -0.243   | -1.16     | 0.251   |     |
| L2 Adults                      | 0.202    | 0.96      | 0.341   |     |
| Condition                      | -1.452   | -33.44    | < 0.001 | *   |
| Time                           | -0.616   | -13.94    | < 0.001 | *   |
| L1 Children x Condition        | 1.087    | 17.92     | < 0.001 | *   |
| L2 Adults x Condition          | 0.507    | 8.42      | < 0.001 | *   |
| L1 Children x Time             | 0.457    | 7.48      | < 0.001 | *   |
| L2 Adults x Time               | -0.004   | -0.06     | 0.949   |     |
| Condition x Time               | -1.098   | -25.41    | < 0.001 | *   |
| L1 Children x Condition x Time | 0.642    | 10.62     | < 0.001 | *   |
| L2 Adults x Condition x Time   | 0.163    | 2.71      | 0.007   | *   |

## Cluster-Based Permutation Analyses

As in Experiment 1, we used cluster-based permutation analyses to evaluate whether participants used deixis to predict the *proximity* of the referent. The below tables summarize results for L1 adults, L1 children, and L2 adults, respectively.

| start | end | cluster.stat | pval    |
|-------|-----|--------------|---------|
| -600  | 500 | 125.7087     | < 0.001 |

| start | end | cluster.stat | pval    |
|-------|-----|--------------|---------|
| 300   | 500 | 19.97367     | < 0.001 |

| start | end  | cluster.stat | pval    |
|-------|------|--------------|---------|
| -400  | -100 | 7.128247     | 0.002   |
| 0     | 500  | 54.967551    | < 0.001 |

We also used cluster-based permutation analysis to compare looks to proximal referents for proximal and distal neutral sentences (e.g., *the cookie/cookies* with a proximal referent vs. *the cookie/cookies* with a distal referent). As with the previous analysis of neutral sentences, we expect to observe significant effects *after* the onset of the noun, indicating that participants oriented to the appropriate proximal and distal referents once they had access to the noun. The below tables summarize results for L1 adults, L1 children, and L2 adults, respectively.

| start | end  | cluster.stat | pval    |
|-------|------|--------------|---------|
| 200   | 1000 | 291.9048     | < 0.001 |

| start | end  | cluster.stat | pval    |
|-------|------|--------------|---------|
| 400   | 1000 | 83.50692     | < 0.001 |

| start | end  | cluster.stat | pval    |
|-------|------|--------------|---------|
| 200   | 1000 | 185.5451     | < 0.001 |

## Proximity Figure

Experiment 2 results. Proportion of looks to proximal referents for L1 adults ( $n = 28$ ), L1 children ( $n = 28$ ), and L2 adults ( $n = 28$ ) during proximal deictic sentences (blue) and distal deictic sentences (purple). Line shading represents one standard error from the mean, averaged by subjects. Vertical dashed lines indicate noun onset (e.g., cookie/cookies). Area shading indicates significant effects from cluster-based permutation analyses ( $ps < 0.05$ ). In sum, results indicate that L1 adults and L2 adults, but not L1 children, used deictic determiners to predict the proximity of the upcoming referent, as evident from anticipatory eye movements generated before the onset of the proximal or distal noun.

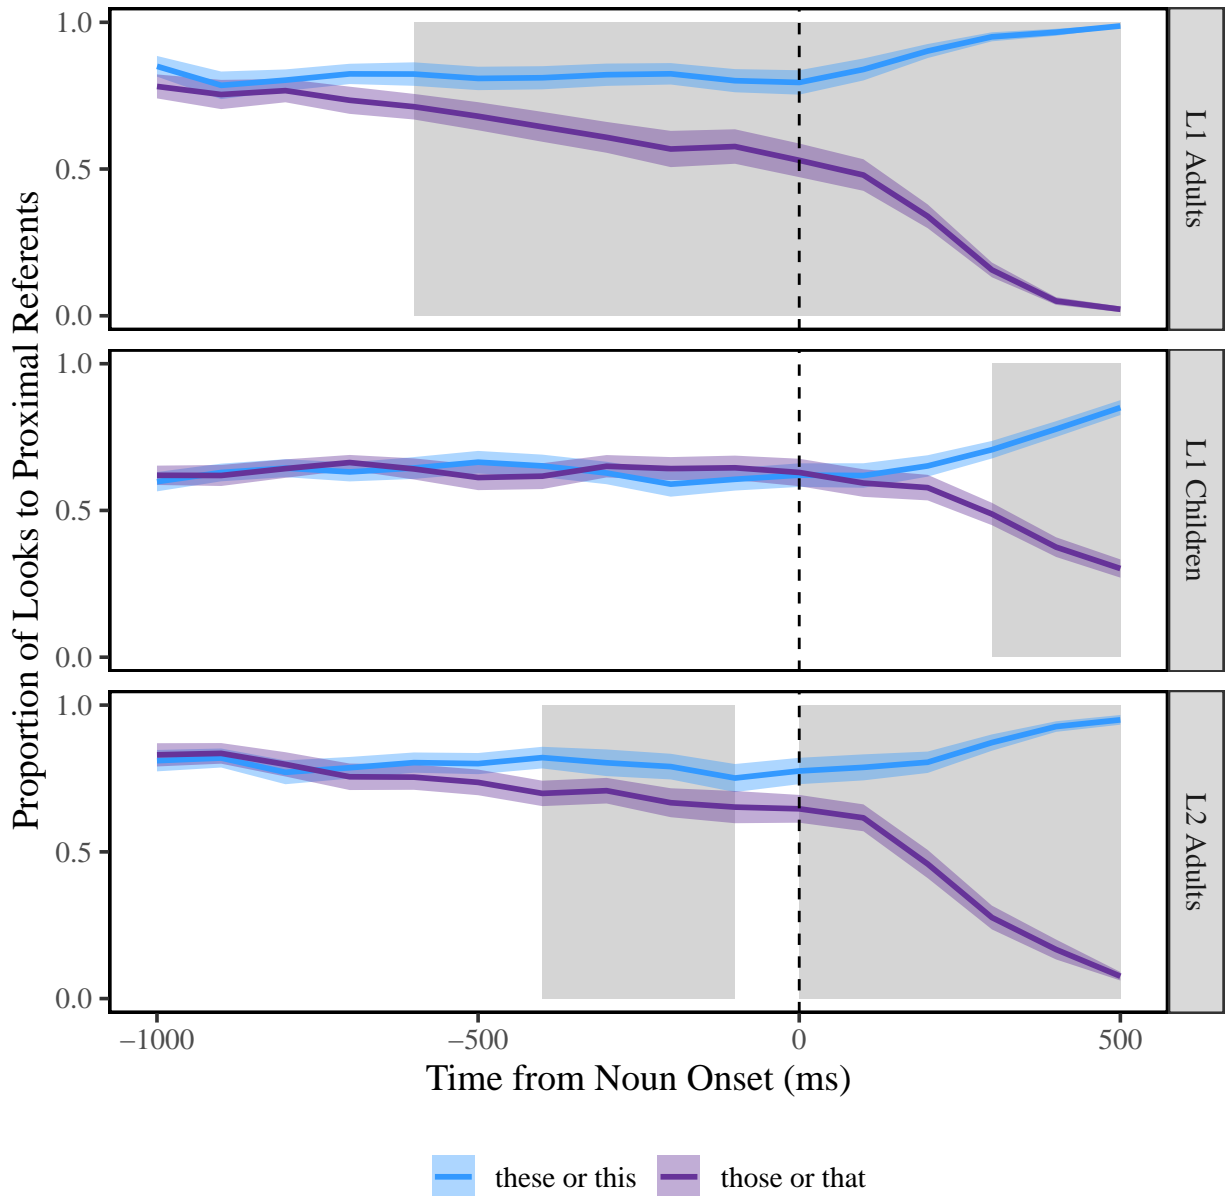

## L2 Adults Language Survey

| Age Started Learning English | Number of Subjects |
|------------------------------|--------------------|
| 3                            | 3                  |
| 4                            | 3                  |
| 5                            | 3                  |
| 6                            | 3                  |
| 7                            | 4                  |
| 8                            | 4                  |
| 9                            | 2                  |
| 10                           | 1                  |
| 13                           | 2                  |
| 14                           | 2                  |
| 16                           | 1                  |

| Measure                              | Min | Max | Mean | SD   |
|--------------------------------------|-----|-----|------|------|
| Proficiency in Speaking English      | 3   | 9   | 7.96 | 1.32 |
| Proficiency in Understanding English | 4   | 9   | 8.39 | 1.13 |
| Proficiency in Reading English       | 5   | 9   | 8.46 | 0.92 |
| Proficiency in Writing English       | 3   | 9   | 7.86 | 1.46 |
| Accent when Speaking English         | 3   | 9   | 6.93 | 1.54 |
| Comfort when Speaking English        | 5   | 9   | 7.86 | 1.15 |

| Measure                                       | Min | Max | Mean | SD   |
|-----------------------------------------------|-----|-----|------|------|
| Years of ESL Classes during Elementary School | 0   | 5   | 2.46 | 2.10 |
| ... during Middle School                      | 0   | 5   | 2.00 | 1.94 |
| ... during High School                        | 0   | 5   | 1.86 | 1.88 |
| ... during College / after High School        | 0   | 5   | 0.89 | 1.50 |

| Do you watch television/movies and/or listen to music in English? | Number of Subjects |
|-------------------------------------------------------------------|--------------------|
| Often                                                             | 21                 |
| Sometimes                                                         | 7                  |

| Native Language(s) | Number of Subjects |
|--------------------|--------------------|
| Cantonese          | 1                  |
| Hebrew             | 1                  |
| Japanese           | 2                  |
| Korean             | 5                  |
| Mandarin           | 3                  |
| Norwegian          | 1                  |
| Portuguese         | 1                  |
| Punjabi            | 1                  |
| Russian            | 4                  |
| Spanish            | 6                  |
| Urdu               | 1                  |
| Urdu and Punjabi   | 1                  |
| Vietnamese         | 1                  |

| Language(s) Spoken at Home before College | Number of Subjects |
|-------------------------------------------|--------------------|
| Cantonese                                 | 1                  |
| French                                    | 1                  |
| Hebrew and English                        | 1                  |
| Japanese                                  | 2                  |
| Korean                                    | 5                  |
| Mandarin                                  | 3                  |
| Norwegian                                 | 1                  |
| Portuguese                                | 1                  |
| Punjabi and English                       | 1                  |
| Russian                                   | 4                  |
| Spanish                                   | 5                  |
| Urdu and Punjabi                          | 2                  |
| Vietnamese                                | 1                  |

## Exploratory Analyses

As in Experiment 1, we conducted exploratory analyses to correlate L2 adults' looking behaviors during eye tracking with their questionnaire measures. The below table summarizes results.

Table 45: Correlation Summary

| Prediction Correlated with...                      | R      | df | p-value |
|----------------------------------------------------|--------|----|---------|
| Age Began Learning English                         | -0.109 | 26 | 0.581   |
| Total Years of English Exposure                    | -0.016 | 26 | 0.935   |
| Total Years of ESL Classes                         | -0.144 | 26 | 0.464   |
| Self-Reported Proficiency in Understanding English | 0.165  | 26 | 0.401   |
| Self-Reported English Proficiency Composite Score  | 0.237  | 26 | 0.224   |

Are any groups suspiciously “accidentally correct” - already looking to the target above chance at determiner onset?

```
##
## One Sample t-test
##
## data: L1s$targetlook.mean
## t = 0.39343, df = 275, p-value = 0.6943
## alternative hypothesis: true mean is not equal to 0.5
## 95 percent confidence interval:
## 0.4534632 0.5697837
## sample estimates:
## mean of x
## 0.5116234

##
## One Sample t-test
##
## data: L1kids$targetlook.mean
## t = -0.36381, df = 347, p-value = 0.7162
## alternative hypothesis: true mean is not equal to 0.5
## 95 percent confidence interval:
## 0.4386732 0.5421809
## sample estimates:
## mean of x
## 0.490427

##
## One Sample t-test
##
## data: L2s$targetlook.mean
## t = -0.98285, df = 301, p-value = 0.3265
## alternative hypothesis: true mean is not equal to 0.5
## 95 percent confidence interval:
## 0.4156235 0.5281671
## sample estimates:
## mean of x
## 0.4718953
```

To evaluate whether there might be early differences in how participants interpret the phonetics of the determiners, we calculated participants' proportion of target looks during an early time window (0-300 ms from determiner onset). We analyzed participants' proportion of target looks for each determiner (*that*, *the*, *these*, *this*, *those*) with logistic mixed-effects models, including interacting fixed effects for language group (contrasts: L1 adults, L1 children, L2 adults) and time (100-ms bins, 0-300 ms from determiner onset), and random intercepts for subjects and items. Experiment 1 model results indicated that there were no significant differences among the three participant groups for any of the determiners. Identical analyses for Experiment 2 indicated that L1 children, as compared to L1 adults, had fewer target looks overall for *this* and had more target looks overall for *those*. This pattern of results is likely due to the fact that L1 adults and L2 adults, as compared to L1 children, had a slight bias to look toward proximal referents. Of course, these exploratory results must be interpreted cautiously. The absence of a significant behavioral effect during this early time window does not definitively determine whether listeners differentially recruited phonetic information of the determiners.

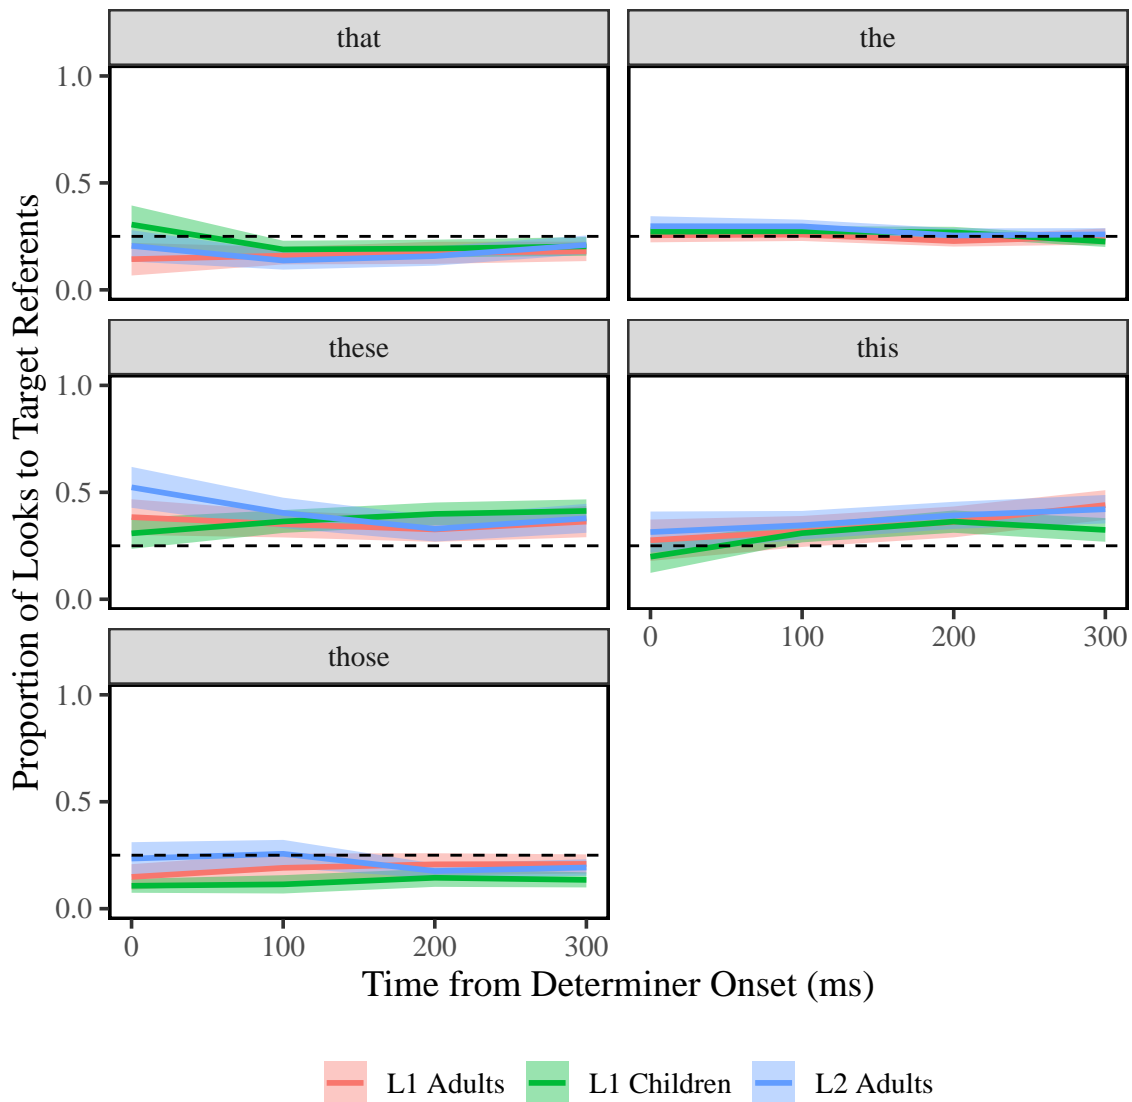



```

##
##
## |term          | estimate| statistic|p.value |sig |
## |:-----|:-----|:-----|:-----|:---|
## |Intercept     |   -2.417|    -7.38|< 0.001 |*   |
## |L1 Children   |    0.191|     0.48|0.63    |    |
## |L2 Adults     |    0.005|     0.01|0.991   |    |
## |Time          |    0.168|     1.10|0.271   |    |
## |L1 Children x Time | -0.256|    -1.24|0.214   |    |
## |L2 Adults x Time  | -0.034|    -0.16|0.873   |    |
##
##
## |term          | estimate| statistic|p.value |sig |
## |:-----|:-----|:-----|:-----|:---|
## |Intercept     |   -1.784|    -8.53|< 0.001 |*   |
## |L1 Children   |    0.026|     0.11|0.909   |    |
## |L2 Adults     |    0.130|     0.56|0.578   |    |
## |Time          |   -0.001|    -0.01|0.992   |    |
## |L1 Children x Time | -0.119|    -0.97|0.33    |    |
## |L2 Adults x Time  |    0.009|     0.07|0.941   |    |
##
##
## |term          | estimate| statistic| p.value|sig |
## |:-----|:-----|:-----|:-----|:---|
## |Intercept     |   -0.860|    -1.71| 0.097|    |
## |L1 Children   |  -0.009|    -0.02| 0.987|    |
## |L2 Adults     |    0.250|     0.44| 0.661|    |
## |Time          |   -0.191|    -1.08| 0.281|    |
## |L1 Children x Time |    0.406|     1.67| 0.095|    |
## |L2 Adults x Time  |  -0.053|    -0.21| 0.834|    |
##
##
## |term          | estimate| statistic| p.value|sig |
## |:-----|:-----|:-----|:-----|:---|
## |Intercept     |   -1.040|    -2.55| 0.013|*   |
## |L1 Children   |  -0.341|    -0.63| 0.530|    |
## |L2 Adults     |    0.016|     0.03| 0.977|    |
## |Time          |    0.267|     1.45| 0.148|    |
## |L1 Children x Time |  -0.136|    -0.55| 0.580|    |
## |L2 Adults x Time  |    0.052|     0.21| 0.836|    |
##
##
## |term          | estimate| statistic|p.value |sig |
## |:-----|:-----|:-----|:-----|:---|
## |Intercept     |   -2.300|    -6.94|< 0.001 |*   |

```

|    |                    |  |        |             |  |  |
|----|--------------------|--|--------|-------------|--|--|
| ## | L1 Children        |  | -0.359 | -0.91 0.368 |  |  |
| ## | L2 Adults          |  | 0.088  | 0.22 0.829  |  |  |
| ## | Time               |  | 0.138  | 0.94 0.345  |  |  |
| ## | L1 Children x Time |  | -0.105 | -0.52 0.604 |  |  |
| ## | L2 Adults x Time   |  | -0.195 | -0.94 0.346 |  |  |

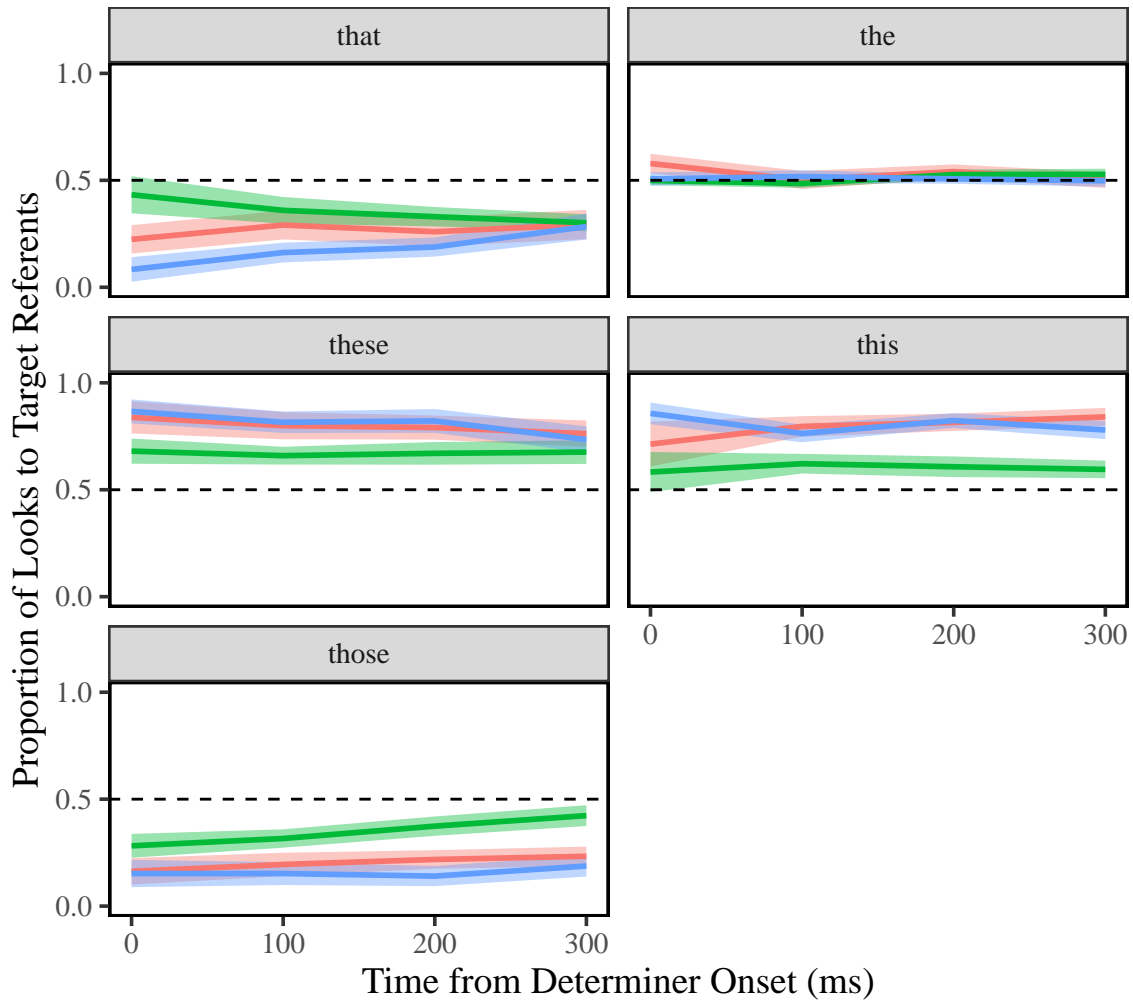

— L1 Adults   
— L1 Children   
— L2 Adults

```
##
##
## |term          | estimate| statistic|p.value |sig |
## |:-----: |-----:|-----:|:-----:|:---|
## |Intercept    | -1.528| -3.79|< 0.001 |*   |
## |L1 Children  |  0.394|  0.80|0.428   |    |
## |L2 Adults    | -0.524| -1.05|0.298   |    |
## |Time         | -0.076| -0.43|0.667   |    |
## |L1 Children x Time | -0.215| -0.90|0.369   |    |
## |L2 Adults x Time  |  0.409|  1.64|0.102   |    |
```

```

##
##
## |term          | estimate| statistic| p.value|sig |
## |:-----|:-----|:-----|:-----|:---|
## |Intercept     |    0.144|     0.78|   0.438|   |
## |L1 Children   |   -0.047|    -0.25|   0.806|   |
## |L2 Adults     |   -0.189|    -0.97|   0.336|   |
## |Time          |   -0.157|    -1.48|   0.139|   |
## |L1 Children x Time |    0.229|     1.59|   0.111|   |
## |L2 Adults x Time  |    0.111|     0.76|   0.449|   |
##
##
## |term          | estimate| statistic|p.value |sig |
## |:-----|:-----|:-----|:-----|:---|
## |Intercept     |    2.166|     5.67|< 0.001 |* |
## |L1 Children   |   -0.948|    -1.95|0.055   |   |
## |L2 Adults     |    0.021|     0.04|0.966   |   |
## |Time          |   -0.196|    -1.15|0.251   |   |
## |L1 Children x Time |    0.192|     0.85|0.395   |   |
## |L2 Adults x Time  |    0.002|     0.01|0.994   |   |
##
##
## |term          | estimate| statistic|p.value |sig |
## |:-----|:-----|:-----|:-----|:---|
## |Intercept     |    2.142|     5.42|< 0.001 |* |
## |L1 Children   |   -1.362|    -3.21|0.002   |* |
## |L2 Adults     |   -0.008|    -0.02|0.985   |   |
## |Time          |    0.279|     1.38|0.167   |   |
## |L1 Children x Time |   -0.208|    -0.79|0.43    |   |
## |L2 Adults x Time  |   -0.325|    -1.20|0.23    |   |
##
##
## |term          | estimate| statistic|p.value |sig |
## |:-----|:-----|:-----|:-----|:---|
## |Intercept     |   -2.158|    -5.82|< 0.001 |* |
## |L1 Children   |    1.158|     2.76|0.007   |* |
## |L2 Adults     |   -0.306|    -0.72|0.476   |   |
## |Time          |    0.240|     1.35|0.178   |   |
## |L1 Children x Time |   -0.043|    -0.18|0.855   |   |
## |L2 Adults x Time  |   -0.206|    -0.86|0.392   |   |

```
